# Supplementary material
Source: PubMed Central journal article supplement (PMC5744747)
Supplement: EHP825.s001.acco.pdf [file EHP825.s001.acco.pdf]

**Note to readers with disabilities:** *EHP* strives to ensure that all journal content is accessible to all readers. However, some figures and Supplemental Material published in *EHP* articles may not conform to [508 standards](#) due to the complexity of the information being presented. If you need assistance accessing journal content, please contact [ehponline@niehs.nih.gov](mailto:ehponline@niehs.nih.gov). Our staff will work with you to assess and meet your accessibility needs within 3 working days.

## **Supplemental Material**

### **Effects of Radon and UV Exposure on Skin Cancer Mortality in Switzerland**

Danielle Vienneau, Kees de Hoogh, Dimitri Hauri, Ana M. Vicedo-Cabrera, Christian Schindler, Anke Huss, and Martin Röösli, for the SNC Study Group

#### **Table of Contents**

**Figure S1.** Exposure distributions for radon in Bq/m<sup>3</sup> (top) and UV-erythemal dose in W/m<sup>2</sup> (bottom)

**Table S1.** Negative control outcome: Population characteristics and number of deaths due to glioma (ICD10: C71, definitive primary cause of death)

**Table S2.** Hazard ratios per IQR (and 95%-confidence intervals) for radon (Bq/m<sup>3</sup>) and UV-erythemal dose (W/m<sup>2</sup>) exposure and type of skin cancer mortality, age 60

**Table S3.** Negative control outcome: Hazard ratios (and 95%-confidence intervals) for radon (per 100 Bq/m<sup>3</sup>) and UV-erythemal dose (per W/m<sup>2</sup>) exposure and glioma (ICD10: C71, definitive primary cause of death), age 60

**Table S4.** Sensitivity analyses (S4) stratified according to outdoor occupation with UV exposure, radon and UV-erythemal dose and mortality from all skin cancers, age 60

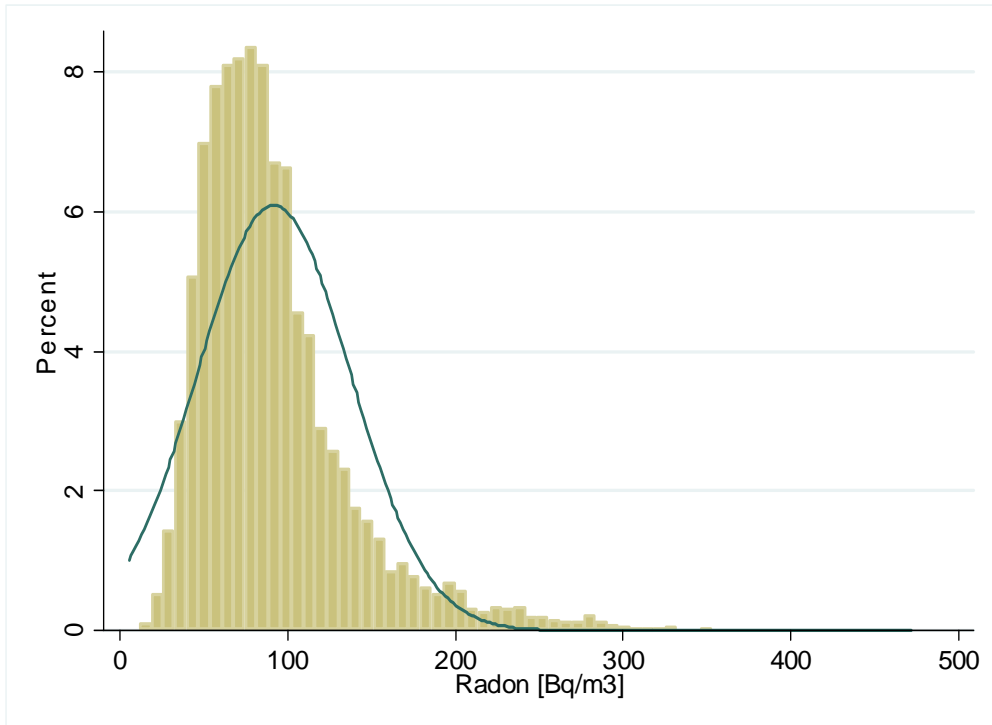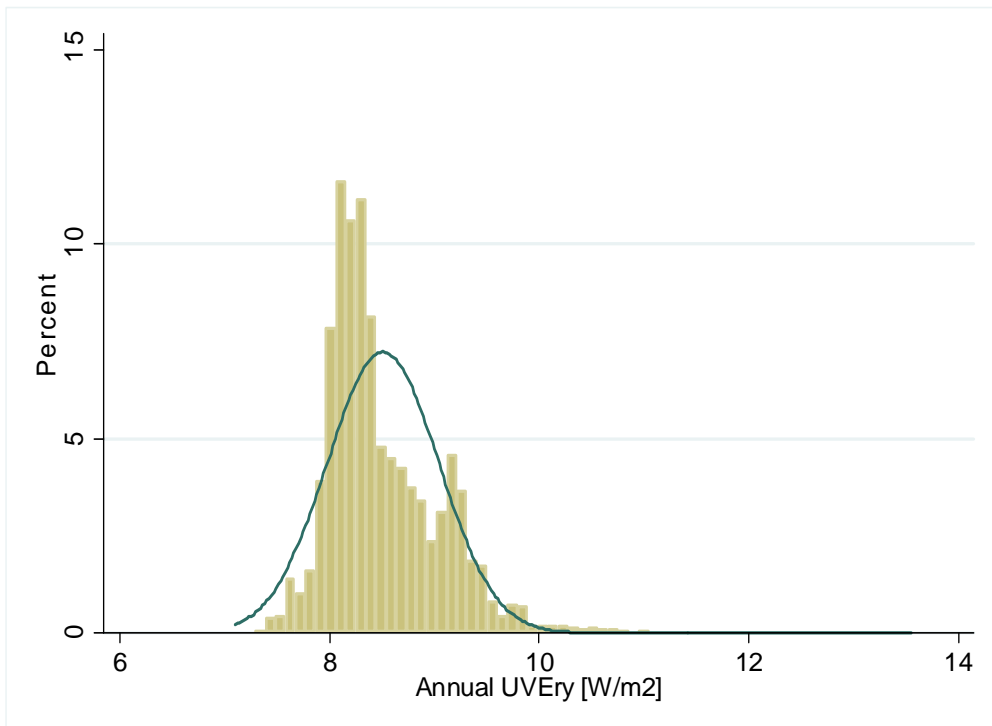

**Figure S1. Exposure distributions for radon in Bq/m<sup>3</sup> (top) and UV-erythemal dose in W/m<sup>2</sup> (bottom)**

**Table S1. Negative control outcome: Population characteristics and number of deaths due to glioma (ICD10: C71, definitive primary cause of death)**

| Characteristic                                          | Cohort            |                | Deaths      |
|---------------------------------------------------------|-------------------|----------------|-------------|
|                                                         | Full study sample | Non-movers     | Glioma      |
| <b>Age</b>                                              |                   |                |             |
| Mean (SD)                                               | 48.2 (17.1)       | 56.0 (16.8)    | 60.5 (13.5) |
| Range                                                   | 20.0 – 106.1      | 20.0 – 106.1   | 20.0 – 93.9 |
| <b>Sex <i>n</i> (%)</b>                                 |                   |                |             |
| Male                                                    | 2535842 (48.3)    | 1183084 (47.4) | 1696 (56.5) |
| Female                                                  | 2713620 (51.7)    | 1312931 (52.6) | 1308 (43.5) |
| <b>Civil status <i>n</i> (%)</b>                        |                   |                |             |
| Single                                                  | 1228004 (23.4)    | 439962 (17.6)  | 291 (9.7)   |
| Married                                                 | 3286724 (62.6)    | 1658643 (66.5) | 2156 (71.8) |
| Widowed                                                 | 354562 (6.8)      | 260613 (10.4)  | 340 (11.3)  |
| Divorced                                                | 380172 (7.2)      | 136797 (5.5)   | 217 (7.2)   |
| <b>Mother tongue <i>n</i> (%)</b>                       |                   |                |             |
| German                                                  | 3377019 (64.3)    | 1699651 (68.1) | 2054 (68.4) |
| French                                                  | 1037545 (19.8)    | 504472 (20.2)  | 582 (19.4)  |
| Italian                                                 | 372662 (7.1)      | 195761 (7.8)   | 225 (7.5)   |
| Other                                                   | 462236 (8.8)      | 96131 (3.9)    | 143 (4.8)   |
| <b>Education <i>n</i> (%)<sup>a</sup></b>               |                   |                |             |
| Compulsory education or less                            | 1206261 (23.0)    | 671863 (26.9)  | 739 (24.6)  |
| Upper secondary level education                         | 2808528 (53.5)    | 1372235 (55.0) | 1571 (52.3) |
| Tertiary level education                                | 1092115 (20.8)    | 427330 (17.1)  | 660 (22.0)  |
| Not known                                               | 142558 (2.7)      | 24587 (1.0)    | 34 (1.1)    |
| <b>Geographic region <i>n</i> (%)</b>                   |                   |                |             |
| Lake Geneva                                             | 936047 (17.8)     | 430820 (17.3)  | 508 (16.9)  |
| Espace Mittelland                                       | 1208921 (23.0)    | 613749 (24.6)  | 721 (24.0)  |
| Northwestern Switzerland                                | 732406 (14.0)     | 361965 (14.5)  | 461 (15.3)  |
| Zurich                                                  | 930514 (17.7)     | 387148 (15.5)  | 486 (16.2)  |
| Eastern Switzerland                                     | 729672 (13.9)     | 351222 (14.1)  | 411 (13.7)  |
| Central Switzerland                                     | 473517 (9.0)      | 232167 (9.3)   | 276 (9.2)   |
| Ticino                                                  | 238385 (4.5)      | 118944 (4.8)   | 141 (4.7)   |
| <b>Job Position <i>n</i> (%)<sup>b</sup></b>            |                   |                |             |
| High                                                    | 415846 (7.9)      | 140618 (5.6)   | 198 (6.6)   |
| Medium                                                  | 1863641 (35.5)    | 737282 (29.5)  | 650 (21.6)  |
| Low                                                     | 1121254 (21.4)    | 457813 (18.3)  | 450 (15.0)  |
| Other                                                   | 1848721 (35.2)    | 1160302 (46.5) | 1706 (56.8) |
| <b>Type of area <i>n</i> (%)</b>                        |                   |                |             |
| Urban                                                   | 3377624 (64.3)    | 1502255 (60.2) | 1893 (63.0) |
| Intermediate                                            | 1192481 (22.7)    | 609414 (24.4)  | 695 (23.1)  |
| Rural                                                   | 679357 (12.9)     | 384346 (15.4)  | 416 (13.8)  |
| <b>Outdoor occupation with UV exposure <i>n</i> (%)</b> |                   |                |             |
| No                                                      | 5008685 (95.4)    | 2375368 (95.2) | 2902 (96.6) |
| Yes                                                     | 240777 (4.6)      | 120647 (4.8)   | 102 (3.4)   |

|                                           |             |             |             |
|-------------------------------------------|-------------|-------------|-------------|
| <b>Radon exposure (Bq/m<sup>3</sup>)</b>  |             |             |             |
| Mean (SD)                                 | 91.8 (45.6) | 95.7 (47.4) | 66.0 (32.3) |
| Range                                     | 5.2-472.0   | 5.6-472.0   | 8.8-271.8   |
| Interquartile range                       | 47.8        | 50.2        | 35.5        |
| <b>UV-erythema dose (W/m<sup>2</sup>)</b> |             |             |             |
| Mean (SD)                                 | 8.5 (0.5)   | 8.5 (0.5)   | 8.5 (0.5)   |
| Range                                     | 7.1-13.6    | 7.1-12.5    | 7.1-11.1    |
| Interquartile range                       | 0.7         | 0.7         | 0.7         |

Notes:

a. Highest completed education/training.

b. Other job position refers to: unemployed or not/no longer in paid employment and includes home-makers and pensioners

**Table S2. Hazard ratios per IQR (and 95%-confidence intervals) for radon (Bq/m<sup>3</sup>) and UV-erythemal dose (W/m<sup>2</sup>) exposure and type of skin cancer mortality, age 60**

| Population <sup>a</sup>                | Model | Deaths (n) | Radon <sup>b</sup>               |                  | UV-erythemal dose <sup>b</sup> |                  |
|----------------------------------------|-------|------------|----------------------------------|------------------|--------------------------------|------------------|
|                                        |       |            | HR (per 47.8 Bq/m <sup>3</sup> ) |                  | HR (per 0.7 W/m <sup>2</sup> ) |                  |
|                                        |       |            | M1                               | M2               | M1                             | M2               |
| <b>Full study sample (n=5,249,462)</b> |       |            |                                  |                  |                                |                  |
| MM (primary)                           | Main  | 1900       | 1.06 (1.01-1.11)                 | 1.07 (1.02-1.13) | 0.98 (0.93-1.04)               | 1.08 (1.01-1.15) |
| MM (all)                               | S1    | 2157       | 1.06 (1.01-1.11)                 | 1.07 (1.02-1.13) | 0.96 (0.91-1.02)               | 1.06 (0.99-1.13) |
| MM+NMSC (primary)                      | S2    | 2349       | 1.06 (1.02-1.11)                 | 1.08 (1.03-1.13) | 1.01 (0.96-1.07)               | 1.09 (1.02-1.15) |
| MM+NMSC (all)                          | S3    | 2989       | 1.06 (1.02-1.11)                 | 1.07 (1.03-1.12) | 0.99 (0.95-1.04)               | 1.06 (1.01-1.12) |
| NMSC (all)                             | S4    | 838        | 1.06 (0.93-1.21)                 | 1.07 (0.93-1.22) | 1.07 (0.98-1.17)               | 1.08 (0.98-1.20) |

Notes:

a. MM = malignant melanoma; NMSC = non-melanoma skin cancer; primary = definitive primary cause of death; all = definitive primary cause of death, concomitant, consecutive, or initial disease.

b. M1 = base model (radon, UVery, sex); M2 = adjusted model (M1 + civil status, educational attainment, SSEP, outdoor occupation with UV exposure, mother tongue).

**Table S3. Negative control outcome: Hazard ratios (and 95%-confidence intervals) for radon (per 100 Bq/m<sup>3</sup>) and UV-erythemal dose (per W/m<sup>2</sup>) exposure and glioma (ICD10: C71, definitive primary cause of death), age 60**

| Population                             | Model            | Deaths (n) | Radon <sup>a</sup>               |                  | UV-erythemal dose <sup>a</sup> |                  |
|----------------------------------------|------------------|------------|----------------------------------|------------------|--------------------------------|------------------|
|                                        |                  |            | HR (per 47.8 Bq/m <sup>3</sup> ) |                  | HR (per 0.7 W/m <sup>2</sup> ) |                  |
|                                        |                  |            | M1                               | M2               | M1                             | M2               |
| <b>Full study sample (n=5,249,462)</b> |                  |            |                                  |                  |                                |                  |
| glioma (primary)                       | Negative control | 3004       | 1.02 (0.94-1.10)                 | 1.02 (0.94-1.10) | 0.95 (0.89-1.02)               | 0.96 (0.89-1.04) |

Notes:

a. M1 = base model (radon, UVery, sex); M2 = adjusted model (M1 + civil status, educational attainment, SSEP, outdoor occupation with UV exposure, mother tongue).

**Table S4. Sensitivity analyses (S4) stratified according to outdoor occupation with UV exposure, radon and UV-erythemal dose and mortality from all skin cancers, age 60**

| <b>Subgroup</b>                                                                      | <b>Radon <sup>a</sup></b><br><b>HR (per 100 Bq/m<sup>3</sup>)</b> | <b>UV-erythemal dose <sup>a</sup></b><br><b>HR (per 1 W/m<sup>2</sup>)</b> | <b>N</b><br><b>Deaths</b> |
|--------------------------------------------------------------------------------------|-------------------------------------------------------------------|----------------------------------------------------------------------------|---------------------------|
| <b>Outdoor occupation with UV exposure – main definition</b>                         |                                                                   |                                                                            |                           |
| No                                                                                   | 1.17 (1.05-1.31)                                                  | 1.09 (0.99-1.21)                                                           | 1849                      |
| Yes                                                                                  | 0.95 (0.52-1.74)                                                  | 1.94 (1.17-3.23)                                                           | 51                        |
| <i>p-value for interaction <sup>b</sup></i>                                          | <i>0.45</i>                                                       | <i>0.09</i>                                                                |                           |
| <b>Outdoor occupation with UV exposure – pensioners moved from “No” to “Unknown”</b> |                                                                   |                                                                            |                           |
| No                                                                                   | 1.19 (1.06-1.34)                                                  | 1.07 (0.96-1.21)                                                           | 1341                      |
| Yes                                                                                  | 0.95 (0.52-1.74)                                                  | 1.94 (1.17-3.23)                                                           | 51                        |
| Unknown                                                                              | 1.17 (0.79-1.17)                                                  | 1.14 (0.95-1.38)                                                           | 508                       |
| <i>p-value for interaction <sup>b</sup></i>                                          | <i>0.72</i>                                                       | <i>0.21</i>                                                                |                           |

Notes:

a. Reported HRs and 95%-confidence intervals are for the main model, i.e. fully adjusted M2 models, for deaths from malignant melanoma (ICD10: C43), definitive primary cause of death.

b. p-value of the Chi square test used to assess between-strata heterogeneity
